# Supplementary material for: Application of a Ni mercaptopyrimidine MOF as highly efficient catalyst for sunlight-driven hydrogen generation
Source: Royal Society of Chemistry journal article supplement (doi:10.1039/c5ta00136f), 2015-01-01
Supplement: c5ta00136f1.pdf [file c5ta00136f1.pdf]

Electronic supplementary information

## Application of a Ni mercaptopyrimidine MOF as a highly efficient catalyst for sunlight-driven hydrogen generation

Yanan Feng,<sup>ac</sup> Chi Chen,<sup>b</sup> Zhuguang Liu,<sup>d</sup> Binjie Fei,<sup>d</sup> Ping Lin,<sup>a</sup> Shigang Sun<sup>b</sup> and Shaowu Du<sup>\*ac</sup>

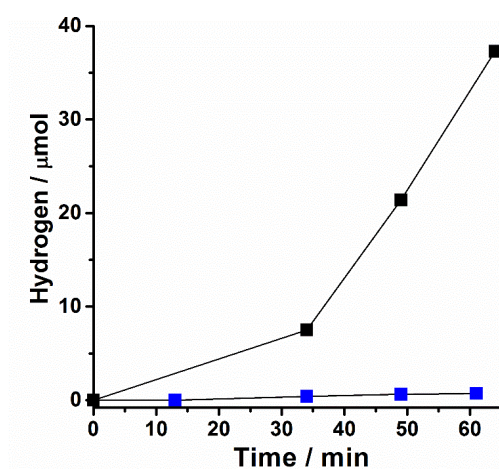

**Figure S1.** The amount of hydrogen photogenerated in the presence of  $[\text{Ni}_2(\text{PymS})_4]_n$  (15 μmol), FI (2 mM) and TEA (15%) in water at pH = 10 (black); (b) the amount of hydrogen photogenerated by the filtrate of the aqueous solution containing  $[\text{Ni}_2(\text{PymS})_4]_n$  (15 μmol), TEA (15%) and FI (2 mM) after stirring for 5 minutes.

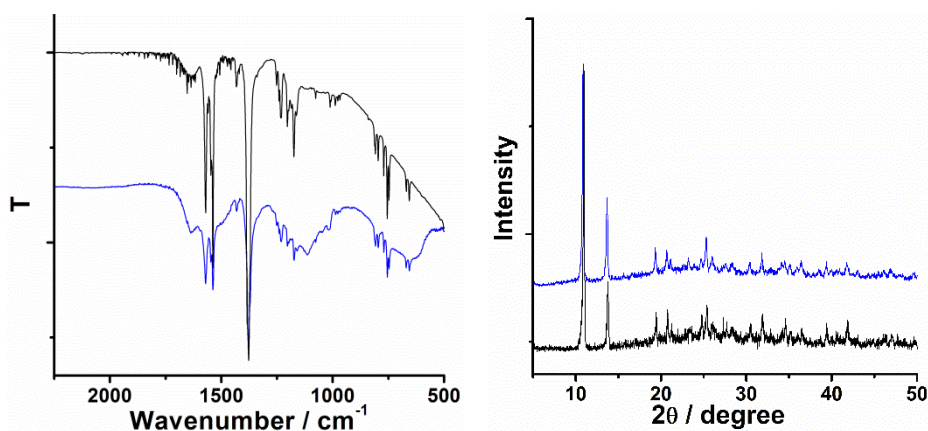

**Figure S2.** FT-IR spectra (left) and powder PXRD patterns (right) of  $[\text{Ni}_2(\text{PymS})_4]_n$  before (black line) and after photocatalytic reactions (blue).

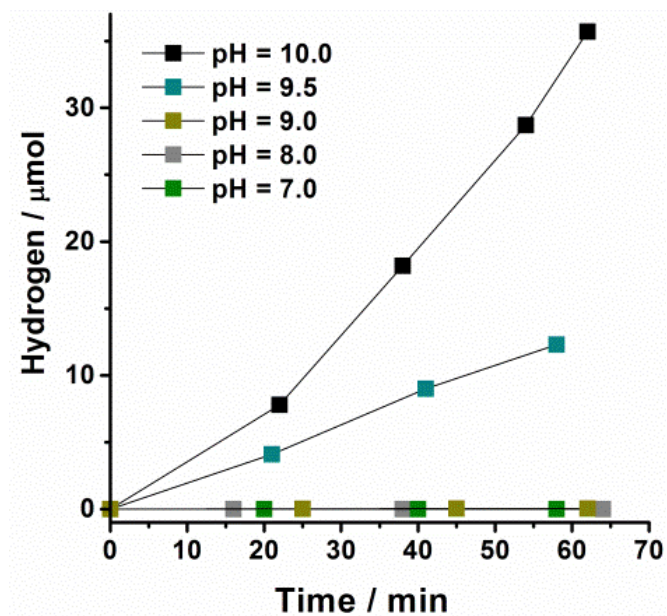

**Figure S3.** The amount of hydrogen photogenerated by  $[\text{Ni}_2(\text{PymS})_4]_n$  ( $10 \mu\text{mol}$ ) with FI ( $2 \text{ mM}$ ) and TEA ( $15\%$ , v/v) in water with varied pH values from 7 to 10.

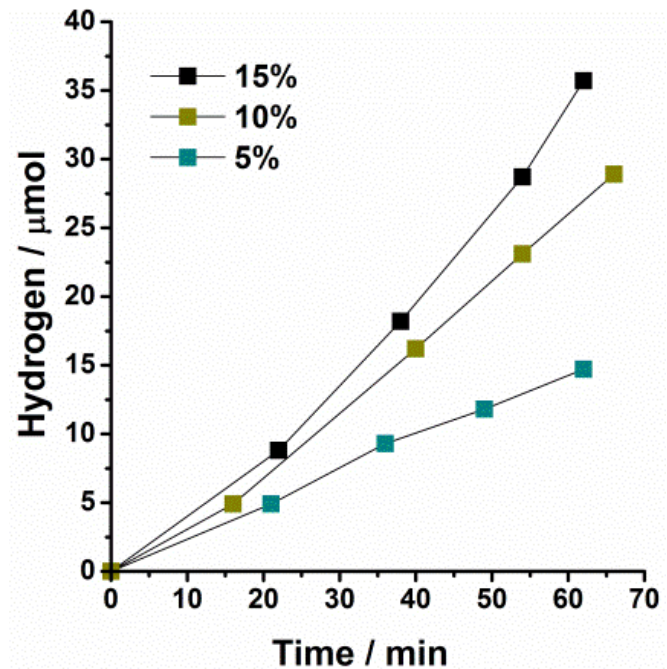

**Figure S4.** The amount of hydrogen photogenerated by  $[\text{Ni}_2(\text{PymS})_4]_n$  ( $10 \mu\text{mol}$ ) with FI ( $2 \text{ mM}$ ) in water when TEA changes from 5% to 15% (v/v).

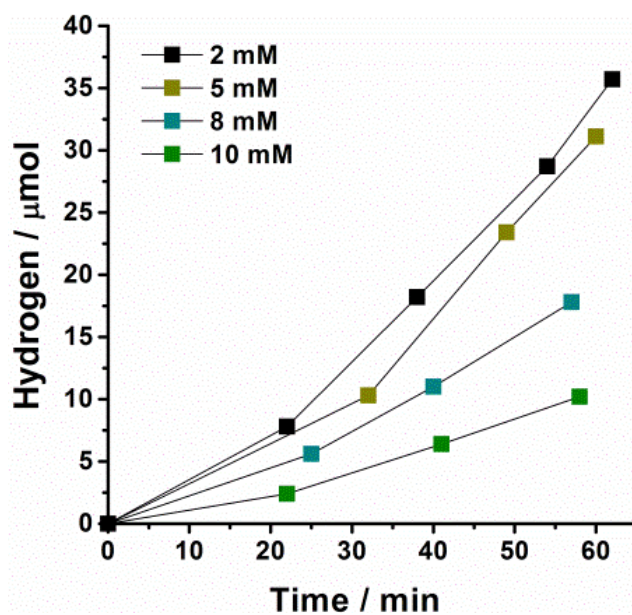

**Figure S5.** The amount of hydrogen photogenerated by  $[\text{Ni}_2(\text{PymS})_4]_n$  ( $10 \mu\text{mol}$ ) with TEA (15%) in water when FI changes from 2 to 10 mM at pH = 10.

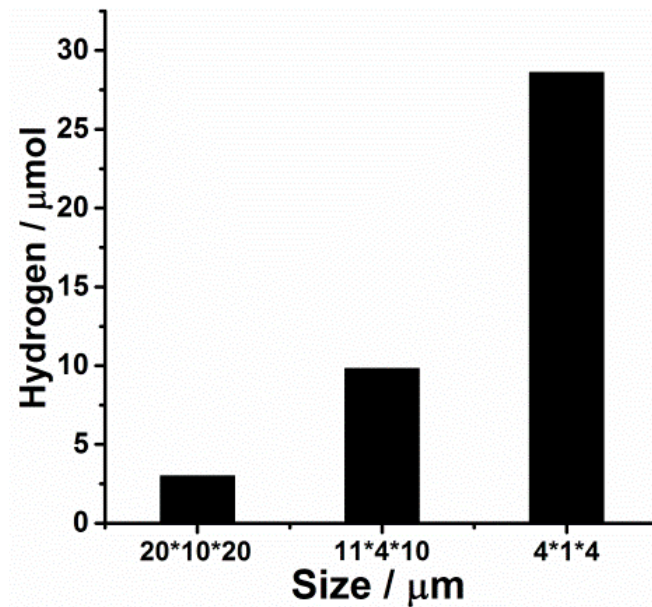

**Figure S6.** The amount of hydrogen photogenerated by  $[\text{Ni}_2(\text{PymS})_4]_n$  ( $5 \mu\text{mol}$ ) with different particle sizes: (a)  $20 \times 10 \times 20 \mu\text{m}$ ; (b)  $11 \times 4 \times 10 \mu\text{m}$ ; (c)  $4 \times 1 \times 4 \mu\text{m}$  in the presence of FI (2 mM) and TEA (15%) in an hour.

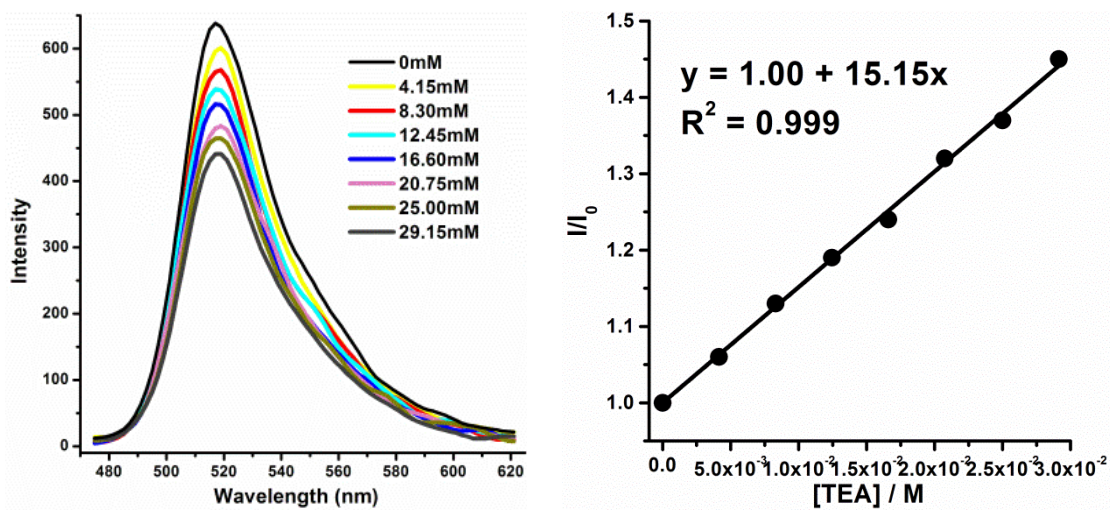

**Figure S7.** Emission quenching (left) and Stern-Volmer plot (right) of FI (0.01 mM) by TEA in water at pH = 10.

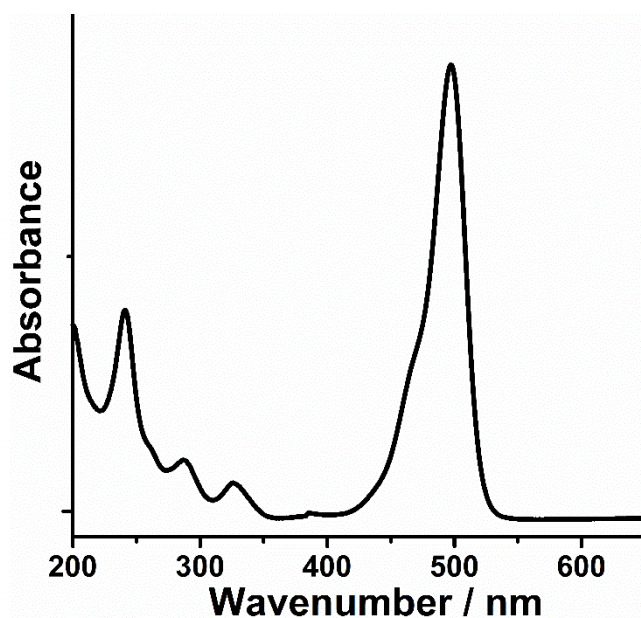

**Figure S8.** UV-vis spectrum of FI (0.002 mM) in aqueous NaOH solution (pH = 10).

**Table S1** TON of the catalyst in different cycles

|    | Cycle 1 | Cycle 2 | Cycle 3 | Cycle 4 |
|----|---------|---------|---------|---------|
| TO |         | 2.5     | 2.2     | 2.0     |
| N  | 2.5     |         |         |         |

All data was calculated from the photocatalytic experiments in the presence of  $[\text{Ni}_2(\text{PymS})_4]_n$  (15  $\mu\text{mol}$ ) Fl (2 mM) and TEA (15%, v/v) at pH = 10.

**Table S2** TOF of different amounts of catalyst for hydrogen production

|                              |      |     |     |     |     |     |
|------------------------------|------|-----|-----|-----|-----|-----|
| $m_{\text{cat}} / \text{mg}$ | 1.4  | 2.1 | 2.8 | 5.6 | 8.4 | 11. |
|                              |      |     |     |     |     | 2   |
| TOF / h <sup>-1</sup>        | 10.6 | 9.0 | 6.5 | 3.5 | 2.5 | 1.7 |

All data was calculated from the photocatalytic experiments in the presence of Fl (2 mM) and TEA (15%, v/v) at pH = 10.
